# Supplementary material for: Surface-enhanced Raman scattering (SERS) chips made from metal nanoparticle-doped polymer fibers
Source: Royal Society of Chemistry journal article supplement (doi:10.1039/c4ra01432d), 2014-01-01
Supplement: c4ra01432d1.pdf [file c4ra01432d1.pdf]

# Electronic Supplementary Information (ESI) for

## Surface-enhanced Raman Scattering (SERS) Chips Made by Metal Nanoparticles Doped Polymer Fibers

*Wenran Gao, Gang Chen, Weiqing Xu, Chenggong Yang, Shuping Xu\**

State Key Laboratory of Supramolecular Structure and Materials, Jilin University, Changchun  
130012, P. R. China

Email: gaoshang5566@126.com (Gao, W. R.); chengang@jlu.edu.cn (Chen, G.); xuwq@jlu.edu.cn  
(Xu, W. Q.); yangcg13@mails.jlu.edu.cn (Yang, C. G.); xusp@jlu.edu.cn (Xu, S. P.)

\*Corresponding Author

Address: State Key Laboratory of Supramolecular Structure and Materials, Jilin University,  
2699 Qianjin Ave.Changchun 130012, P. R. China

Email:xusp@jlu.edu.cn

Tel: 86-431-85168505

Fax:86-431-85193421

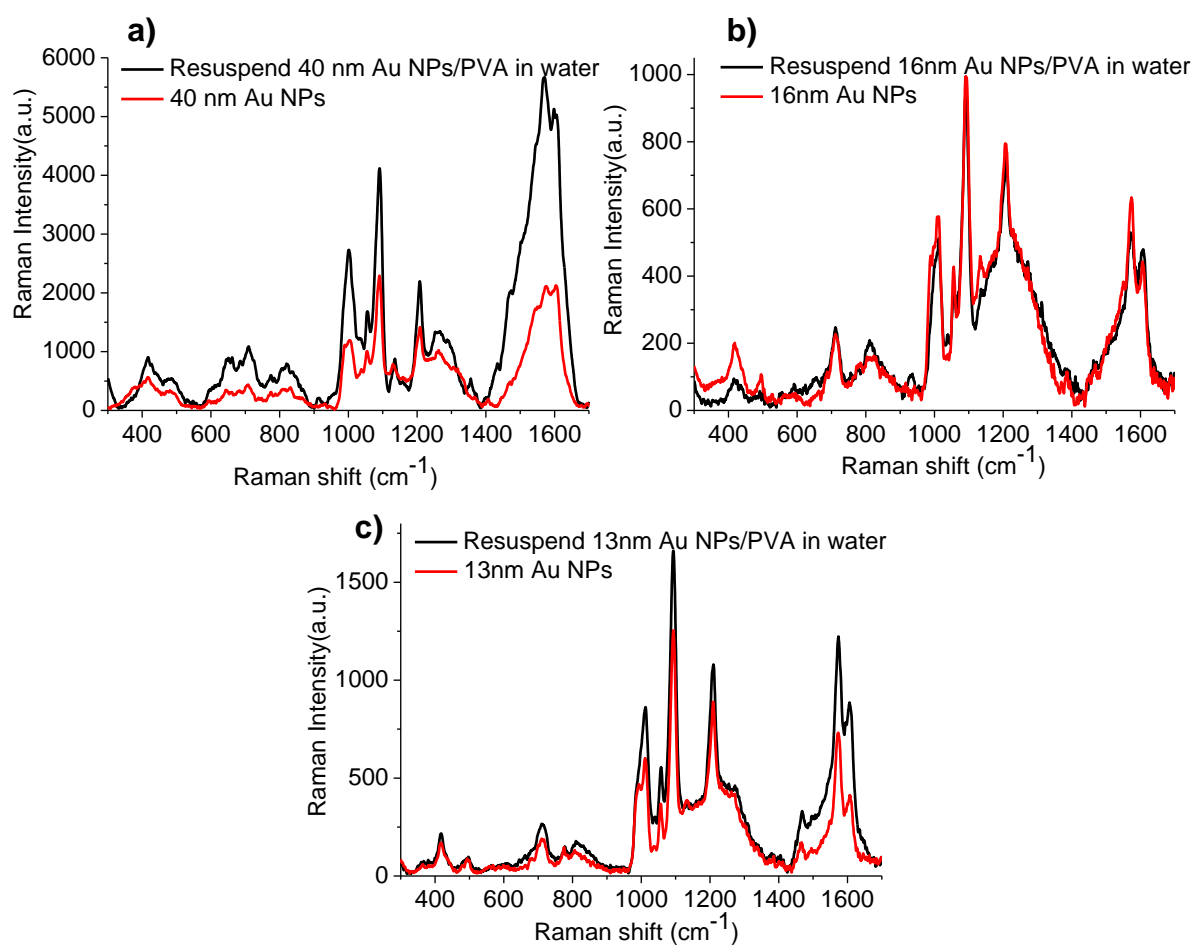

Figure S1. SERS spectra of 4-MPY ( $1 \times 10^{-5}$  M) obtained from Au NP colloids or the dissolved Au NPs/PVA fibers on glass substrates under 633 nm excitation. a)-c); 13 , 16 and 40 nm Au NPs.

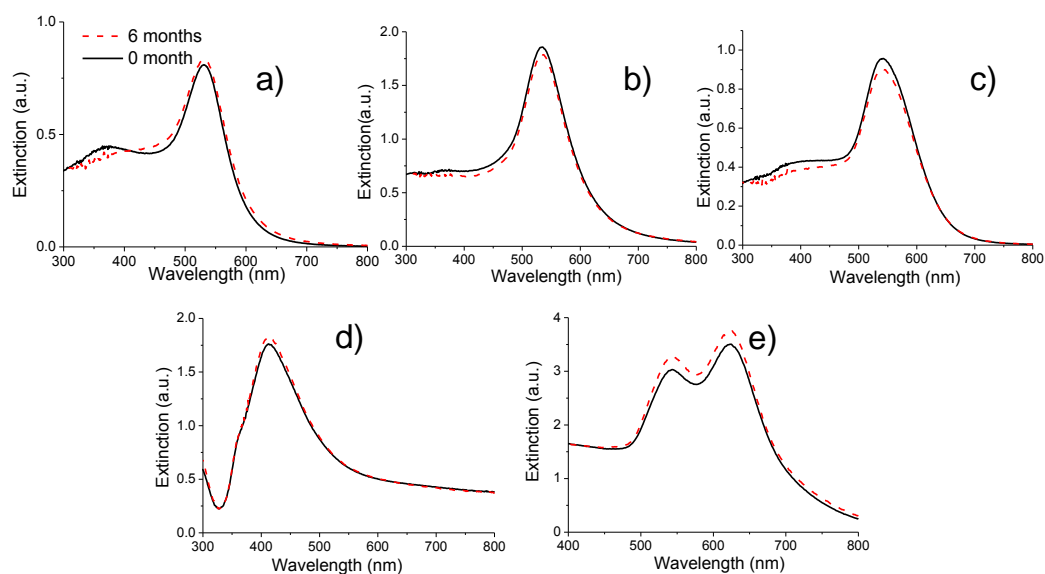

Figure S2. Extinction spectra of five kinds of metal NPs doped polymer fibers before (solid lines) and after 6 months storage (dash lines). a-e correspond to 13, 16 and 40 nm Au NPs, Ag NPs and Au nanorods, respectively.

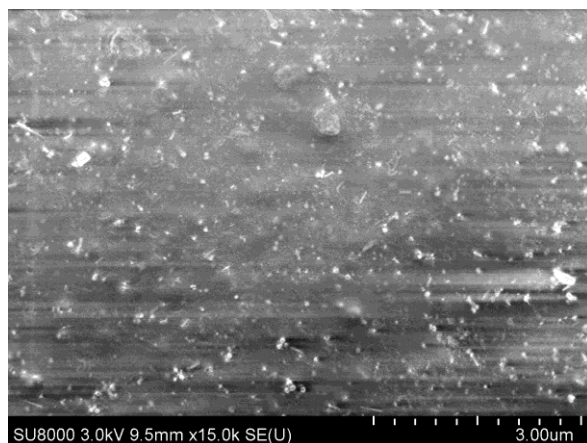

Figure S3. SEM image of SERS chip II after a 4-MPY aqueous solution was dripped on and dried.

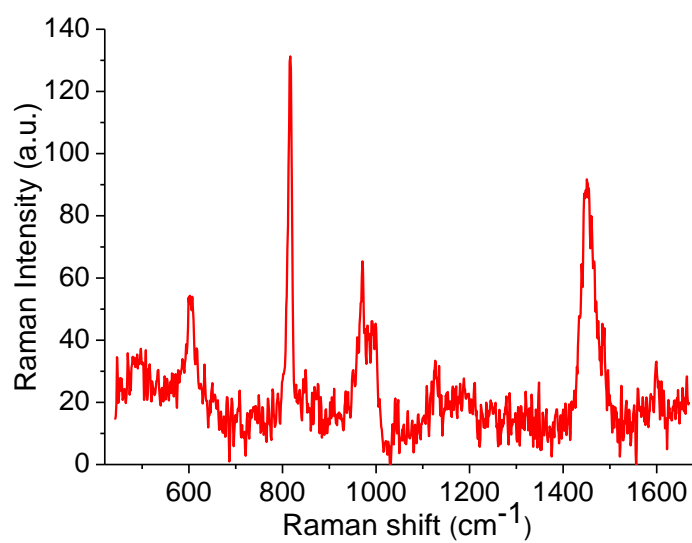

Figure S4. SERS spectrum of PMMA under 633 nm excitation.

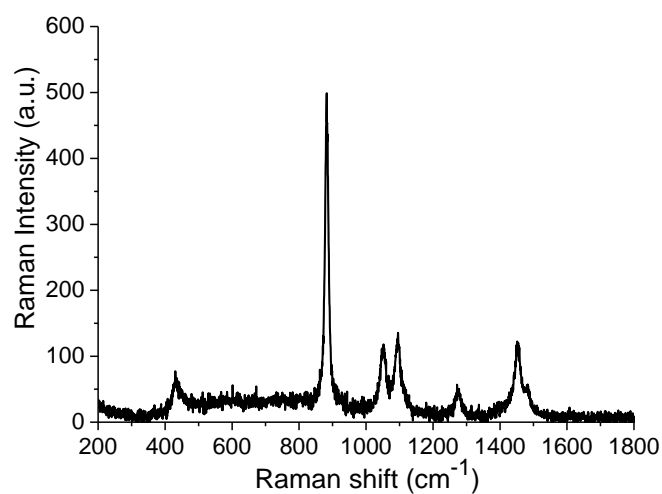

Figure S5. SERS spectrum of ethanol under 633 nm excitation.
